# Supplementary material for: Biomarker panels associated with progression of renal disease in type 1 diabetes
Source: Springer Nature journal article supplement (doi:10.1007/s00125-019-4915-0), 2019-06-20
Supplement: MOESM1 [file 16838034]

# Electronic Supplementary Materials

## Biomarker panels associated with progression of renal disease in type 1 diabetes

*Marco Colombo, Erkka Valo, Stuart J. McGurnaghan, Niina Sandholm, Luke A.K. Blackbourn, R. Neil Dalton, David Dunger, Per-Henrik Groop, Paul M. McKeigue, Carol Forsblom, Helen M. Colhoun on behalf of the FinnDiane Study Group and the Scottish Diabetes Research Network (SDRN) Type 1 Bioresource Collaboration*

### ESM Methods

#### Use of hierarchical shrinkage priors

We adopted a Bayesian modelling approach based on hierarchical shrinkage priors [1], in which the clinical covariates used to control for confounding in the models were assigned a Gaussian prior (which induces some shrinkage), while the biomarkers were penalised through the horseshoe prior to promote sparsity [2], [3]. Standard methods for penalized regression include ridge regression (equivalent to a Gaussian prior on all coefficients) or LASSO regression (equivalent to a double exponential prior). Hierarchical shrinkage priors (such as the horseshoe) are more flexible than either of these, allowing the model for instance to learn a spike-and-slab distribution of effect sizes (in which a few variables have large effects but most have near zero effects) if that is what the data support. Developments in Bayesian computation, implemented in programs such as Stan and PyMC3, have made it possible to use these more flexible priors, even when some variables have high posterior correlations.

#### Note on the expected information for discrimination

For logistic regression models besides reporting the area under the ROC curve (AUC), we also presented the expected information for discrimination  $\Lambda$  expressed in bits [4]. The expected information for discrimination is the average weight of evidence (log-likelihood ratio) favouring true (case or control) over false (control or case) status, where the average is taken over the sampling distributions of the weight of evidence in cases and controls. A key advantage of using the information for discrimination is that the contributions of independent predictors are additive. Therefore, this is a better measure of the incremental contribution of biomarkers to the predictive performance, as it captures the amount of additional information that they contain over and beyond the initial set of clinical covariates. Computations were done with the R package `wevid` (version 0.6: <https://CRAN.R-project.org/package=wevid>).

#### Note on the projection predictive method

To recover a sparse model, we applied a projection approach according to which the high-dimensional posterior draws of the model containing all biomarkers (full model) are projected to lower-dimensional subspaces [5], [6]. The advantages of the projection predictive method for variable selection have been discussed by Piironen and Vehtari [7]. The method compares the predictive distribution of each candidate model based on a subset of variables to the predictive distribution of the full model, using the Kullback-Leibler (KL) divergence to evaluate the discrepancy between the candidate model and the full model. By fitting the candidate model to the predictive distribution rather than to the target variable, overfitting is reduced.

## ESM References

- [1] Peltola T, Havulinna AS, Salomaa V, Vehtari A. Hierarchical Bayesian survival analysis and projective covariate selection in cardiovascular event risk prediction. In: Laskey KB, Jones J, Almond R, editors. Proceedings of eleventh UAI Bayesian Modeling Applications Workshop (BMAW 2014), CEUR workshop proceedings, vol. 1218, 2014, pp. 79–88.
- [2] Carvalho C, Polson N, Scott J. The horseshoe estimator for sparse signals. *Biometrika* 2010;97:465–80.
- [3] Piironen J, Vehtari A. On the hyperprior choice for the global shrinkage parameter in the horseshoe prior. In: Proceedings of the 20th international conference on artificial intelligence and statistics (AISTATS), PMLR, vol. 54, 2017, pp. 905–13.
- [4] McKeigue P. Quantifying performance of a diagnostic test as the expected information for discrimination: Relation to the C-statistic. *Statistical Methods in Medical Research* 2018.
- [5] Goutis C, Robert CP. Model choice in generalised linear models: A Bayesian approach via Kullback-Leibler projections. *Biometrika* 1998;85:29–37.
- [6] Dupuis J, Robert CP. Variable selection in qualitative models via an entropic explanatory power. *Journal of Statistical Planning and Inference* 2003;111:77–94.
- [7] Piironen J, Vehtari A. Comparison of Bayesian predictive methods for model selection. *Statistics and Computing* 2017;27:711–35.

ESM Table 1: Participant characteristics at study day stratified by rapid progression status

| Covariate                                                        | SDRNT1BIO         |                            |                   | FimmDiane                  |
|------------------------------------------------------------------|-------------------|----------------------------|-------------------|----------------------------|
|                                                                  | Stable (N = 665)  | Rapid progressor (N = 194) | Stable (N = 188)  | Rapid progressor (N = 127) |
| <b>Main characteristics</b>                                      |                   |                            |                   |                            |
| Age (years)                                                      | 55.7 (46.2, 64.5) | 54.5 (45.9, 63.8)          | 46.8 (37.8, 53.7) | 43.6 (33.8, 50.7)          |
| Sex (Female)                                                     | 58.2%             | 52.1%                      | 47.9%             | 40.2%                      |
| Diabetes duration (years)                                        | 26.4 (16.9, 37.9) | 26.7 (18.9, 36.5)          | 33.4 (26.9, 39.1) | 29.9 (24.3, 34.8)          |
| <b>Kidney function</b>                                           |                   |                            |                   |                            |
| eGFR (ml/min/1.73m <sup>2</sup> )                                | 72.5 (62.8, 83.7) | 70.2 (57.3, 85.4)          | 61.1 (47.5, 68.4) | 54.3 (43.6, 64.0)          |
| Achieved eGFR (ml/min/1.73m <sup>2</sup> )                       | 76.6 (64.2, 88.3) | 53.3 (32.8, 74.1)          | 51.8 (30.9, 64.3) | 10.0 (10.0, 10.0)          |
| Weighted average of historical eGFR (ml/min/1.73m <sup>2</sup> ) | 81.5 (70.6, 91.3) | 80.2 (70.7, 91.9)          | 68.2 (58.6, 78.0) | 58.7 (45.8, 71.9)          |
| Albumin/creatinine ratio (mg/mmol)                               | 0.5 (0.3, 1.2)    | 1.1 (0.4, 10.2)            | 11.8 (4.7, 43.3)  | 56.3 (20.5, 129.5)         |
| ACR category (Normo/Micro/Macro)                                 | 87.9%/10.0%/2.1%  | 67.7%/13.4%/18.8%          | 0%/37.8%/62.2%    | 0%/11.8%/88.2%             |
| Prospective eGFR slope (ml/min/1.73m <sup>2</sup> /year)         | -0.1 (-1.4, 1.1)  | -5.2 (-6.7, -4.0)          | -1.3 (-2.1, -0.3) | -5.0 (-7.1, -3.9)          |
| <b>Other covariates</b>                                          |                   |                            |                   |                            |
| Length of follow-up (years)                                      | 5.2 (4.5, 5.7)    | 5.1 (4.4, 5.7)             | 10.3 (7.2, 13.3)  | 6.5 (4.8, 9.8)             |
| HbA1c (mmol/mol)                                                 | 67 (60, 77)       | 73 (64, 88)                | 68 (58, 76)       | 79 (69, 88)                |
| HbA1c (%)                                                        | 8.3 (7.6, 9.2)    | 8.8 (8.0, 10.2)            | 8.4 (7.5, 9.1)    | 9.4 (8.5, 10.2)            |
| Body mass index (kg/m <sup>2</sup> )                             | 27.1 (24.6, 30.3) | 27.4 (24.6, 30.7)          | 26.0 (23.2, 28.0) | 25.6 (23.4, 28.7)          |
| HDL-C (mmol/l)                                                   | 1.6 (1.3, 1.9)    | 1.5 (1.2, 1.9)             | 0.9 (0.7, 1.1)    | 0.8 (0.6, 1.0)             |
| Total cholesterol (mmol/l)                                       | 4.5 (3.9, 5.1)    | 4.5 (4.0, 5.3)             | 5.0 (4.4, 5.6)    | 5.3 (4.7, 6.0)             |
| Systolic blood pressure (mmHg)                                   | 133 (121, 144)    | 137 (126, 151)             | 141 (130, 154)    | 150 (132, 159)             |
| Diastolic blood pressure (mmHg)                                  | 74 (68, 80)       | 75 (68, 82)                | 80 (71, 87)       | 84 (78, 90)                |
| Ever smoker                                                      | 64.2%             | 65.5%                      | 47.9%             | 58.3%                      |
| On any anti-hypertensive treatment                               | 59.2%             | 70.1%                      | 93.6%             | 95.3%                      |
| On ACE or ARB                                                    | 53.8%             | 65.5%                      | 85.6%             | 86.6%                      |

We report median and interquartile range (IQR) for continuous variables, and frequency for categorical variables

Stable: prospective eGFR slope  $\geq -3\text{ml min}^{-1}[1.73\text{m}]^{-2}$

Rapid progressor: prospective eGFR slope  $< -3\text{ml min}^{-1}[1.73\text{m}]^{-2}$

ESM Table 2: Summary characteristics of all biomarkers measured in the study

| Biomarker                                          | Units | SDRNTIBIO                       |                 |       | FimmDiane                       |                  |       |
|----------------------------------------------------|-------|---------------------------------|-----------------|-------|---------------------------------|------------------|-------|
|                                                    |       | Median (IQR)                    | Range           | Below | Median (IQR)                    | Range            | Below |
| <b>Luminex proteins</b>                            |       |                                 |                 |       |                                 |                  |       |
| Alpha-1-Microglobulin                              | µg/mL | 17.0 (14.0, 22.0)               | 4.3 – 77.5      |       | 31.0 (23.0, 40.0)               | 6.6 – 119.0      |       |
| Beta-2-Microglobulin                               | µg/mL | 2.3 (1.8, 2.9)                  | 0.9 – 8.3       |       | 3.9 (3.0, 5.2)                  | 1.0 – 13.0       |       |
| Calbindin                                          | ng/mL | Intraclass correlation < 0.4    |                 | 51.2  | Affected by storage conditions  |                  | 43.1  |
| CD27 antigen                                       | U/mL  | 42.0 (29.0, 69.0)               | 0.4 – 510.0     | 0.1   | 183.8 (112.0, 301.5)            | 19.0 – 867.0     |       |
| Clusterin                                          | µg/mL | Intraclass correlation < 0.4    |                 |       | Affected by storage conditions  |                  |       |
| Cystatin-C                                         | ng/mL | 758.0 (632.5, 948.0)            | 333.0 – 2100.0  |       | 1110.0 (900.5, 1370.0)          | 365.0 – 4480.0   |       |
| Eotaxin-2                                          | pg/mL | 884.0 (569.5, 1420.0)           | 51.0 – 6510.0   |       | Affected by storage conditions  |                  |       |
| Fatty Acid-Binding Protein, heart                  | ng/mL | 4.6 (4.6, 4.6)                  | 4.6 – 77.0      | 90.6  | Intraclass correlation < 0.4    |                  | 84.8  |
| Fibroblast Growth Factor 21                        | ng/mL | 0.1 (0.1, 0.3)                  | 0.1 – 2.8       | 38.3  | 0.3 (0.2, 0.5)                  | 0.1 – 5.3        |       |
| Fibroblast Growth Factor 23                        | ng/mL | 0.1 (0.1, 0.1)                  | 0.0 – 2.7       | 88.0  | 0.1 (0.0, 0.1)                  | 0.0 – 0.8        | 30.2  |
| Growth-Regulated alpha protein                     | pg/mL | 123.0 (92.0, 173.0)             | 13.0 – 968.0    |       | 128.0 (90.5, 189.0)             | 21.0 – 653.0     |       |
| Insulin-like Growth Factor-Binding Protein 7       | ng/mL | 43.0 (36.0, 49.0)               | 9.3 – 90.0      |       | 53.0 (45.0, 64.0)               | 6.6 – 166.5      |       |
| Interleukin-1 receptor type 1                      | pg/mL | 1250.0 (1060.0, 1460.0)         | 216.0 – 2840.0  |       | Affected by storage conditions  |                  |       |
| Interleukin-1 receptor type 2                      | ng/mL | 8.6 (7.2, 10.0)                 | 1.6 – 19.0      |       | Affected by storage conditions  |                  |       |
| Interleukin-2 receptor alpha                       | pg/mL | 2620.0 (2100.0, 3340.0)         | 955.0 – 12600.0 |       | 3250.0 (2475.0, 4165.0)         | 1130.0 – 12100.0 |       |
| Kidney Injury Molecule-1                           | ng/mL | 0.0 (0.0, 0.1)                  | 0.0 – 1.3       | 47.3  | 0.1 (0.0, 0.2)                  | 0.0 – 2.5        | 16.1  |
| Latency-Associated-Peptide                         | ng/mL | 11.0 (8.6, 12.8)                | 0.6 – 20.0      |       | 9.2 (6.8, 12.0)                 | 0.8 – 23.0       |       |
| Lectin-Like Oxidized LDL Receptor 1                | ng/mL | 0.8 (0.3, 1.3)                  | 0.3 – 7.1       | 29.3  | 0.3 (0.3, 1.1)                  | 0.3 – 6.6        | 53.4  |
| Neutrophil Gelatinase-Associated Lipocalin         | ng/mL | 381.0 (282.0, 519.0)            | 58.0 – 1410.0   |       | Affected by storage conditions  |                  |       |
| N-terminal prohormone of brain natriuretic peptide | pg/mL | 289.0 (136.0, 632.5)            | 7.5 – 10650.0   | 0.6   | 39.0 (7.5, 182.5)               | 7.5 – 7690.0     | 35.5  |
| Osteopontin                                        | ng/mL | 12.0 (8.5, 17.0)                | 0.9 – 65.0      | 0.1   | 9.1 (6.4, 13.0)                 | 0.9 – 54.0       | 0.6   |
| Osteoprotegerin                                    | pM    | 6.8 (5.5, 8.4)                  | 0.6 – 19.0      |       | 6.6 (5.4, 8.1)                  | 1.8 – 16.0       |       |
| Progranulin                                        | ng/mL | 11.0 (7.9, 16.0)                | 2.4 – 2190.0    | 6.4   | 14.0 (11.0, 21.0)               | 2.4 – 276.0      | 2.1   |
| Tamm-Horsfall Urinary Glycoprotein                 | µg/mL | 0.1 (0.0, 0.1)                  | 0.0 – 0.1       | 0.1   | 0.1 (0.0, 0.1)                  | 0.0 – 0.1        |       |
| Thrombomodulin                                     | ng/mL | 5.0 (4.2, 6.2)                  | 1.8 – 19.0      |       | 7.7 (5.7, 10.0)                 | 2.3 – 22.0       |       |
| Thymus-Expressed Chemokine                         | pg/mL | 275.0 (154.0, 457.0)            | 39.0 – 4040.0   | 4.0   | 277.0 (180.5, 437.0)            | 47.5 – 2670.0    | 6.7   |
| Tissue Inhibitor of Metalloproteinases 1           | ng/mL | 141.0 (123.0, 163.0)            | 65.0 – 340.0    |       | 168.0 (142.0, 193.0)            | 70.0 – 323.0     |       |
| Trefol Factor 3                                    | µg/mL | 0.1 (0.1, 0.2)                  | 0.0 – 3.0       |       | Affected by storage conditions  |                  |       |
| Tumor Necrosis Factor Receptor I                   | pg/mL | 1760.0 (1340.0, 2385.0)         | 99.0 – 8340.0   |       | 2700.0 (1905.0, 3620.0)         | 242.0 – 11300.0  |       |
| Vascular Endothelial Growth Factor                 | pg/mL | 256.0 (167.0, 388.0)            | 21.0 – 1060.0   | 0.4   | 276.0 (155.0, 446.0)            | 21.0 – 2030.0    | 2.3   |
| <b>LC-MSMS metabolites</b>                         |       |                                 |                 |       |                                 |                  |       |
| 1-Methyl-histidine                                 | µM/L  | 5.1 (2.2, 11.8)                 | 0.2 – 79.0      | 3.6   | 5.6 (2.9, 12.5)                 | 0.2 – 150.0      | 0.6   |
| 3-hydroxykynurenine                                | nM/L  | Excessive left-censoring        |                 | 99.9  | Excessive left-censoring        | 98.2             | 98.2  |
| 3-hydroxytyramine HCl [conf]                       | µM/L  | 0.1 (0.1, 0.1)                  | 0.1 – 9.6       | 97.7  | Excessive left-censoring        | 98.5             | 98.5  |
| 3-hydroxytyramine HCl                              | µM/L  | 0.1 (0.1, 0.1)                  | 0.1 – 7.0       | 97.7  | Excessive left-censoring        | 98.2             | 98.2  |
| 3-Methyl-histidine                                 | µM/L  | 4.5 (3.4, 6.0)                  | 0.7 – 24.2      |       | 7.1 (5.1, 9.8)                  | 1.0 – 33.8       |       |
| 3OMD                                               | nM/L  | 189.0 (161.0, 219.0)            | 69.0 – 3788.0   |       | Intraclass correlation < 0.4    |                  |       |
| 5-HIAA                                             | nM/L  | Excessive left-censoring        |                 | 99.7  | Excessive left-censoring        | 98.2             | 98.2  |
| 5-hydroxytryptophan                                | nM/L  | Excessive left-censoring        |                 | 99.8  | Excessive left-censoring        | 98.5             | 98.5  |
| 8OHdG                                              | nM/L  | Excessive left-censoring        |                 | 99.7  | Excessive left-censoring        | 97.9             | 97.9  |
| Adenine [conf]                                     | nM/L  | Excessive missingness at random |                 |       | Excessive missingness at random |                  |       |
| Adenine                                            | nM/L  | Excessive missingness at random |                 |       | Excessive missingness at random |                  |       |
| Adenosine                                          | nM/L  | Excessive left-censoring        |                 | 99.1  | Excessive left-censoring        | 98.2             | 98.2  |
| ADMA                                               | nM/L  | 468.5 (411.6, 523.0)            | 270.0 – 958.0   |       | 478.0 (431.0, 537.0)            | 220.0 – 769.0    |       |
| Alanine                                            | µM/L  | 452.5 (383.9, 525.9)            | 152.0 – 1329.3  |       | Affected by storage conditions  |                  |       |
| Anthranilic acid                                   | nM/L  | Excessive left-censoring        |                 | 99.9  | 250.0 (250.0, 250.0)            | 250.0 – 1043.0   | 91.2  |
| Arginine                                           | µM/L  | 116.9 (102.1, 134.9)            | 52.0 – 341.3    |       | Affected by storage conditions  |                  |       |
| Argininosuccinic acid                              | µM/L  | Excessive left-censoring        |                 | 99.9  | Excessive left-censoring        | 98.5             | 98.5  |
| Argininosuccinic anhydride                         | µM/L  | Excessive left-censoring        |                 | 99.9  | Excessive left-censoring        | 98.5             | 98.5  |
| Aspartic acid                                      | µM/L  | 24.5 (20.4, 29.6)               | 11.1 – 49.9     |       | Affected by storage conditions  |                  |       |

ESM Table 2: Summary characteristics of all biomarkers measured in the study (continued)

| Biomarker                        | Units | SDRNT1B10                       |                  |       | FinnDiane                       |                |       |
|----------------------------------|-------|---------------------------------|------------------|-------|---------------------------------|----------------|-------|
|                                  |       | Median (IQR)                    | Range            | Below | Median (IQR)                    | Range          | Below |
| Beta-Alanine                     | µM/L  | 9.8 (8.4, 11.8)                 | 4.3 – 83.9       |       | 9.5 (8.3, 11.3)                 | 5.2 – 46.5     |       |
| C10:1 Carnitine                  | nM/L  | 99.0 (69.0, 141.0)              | 5.0 – 525.0      | 0.6   | 80.5 (43.0, 125.0)              | 5.0 – 403.0    | 1.8   |
| C10 Carnitine                    | nM/L  | 157.0 (100.0, 252.1)            | 15.0 – 1472.0    | 1.5   | 149.5 (88.5, 252.8)             | 15.0 – 1490.0  | 2.1   |
| C12 Carnitine                    | nM/L  | 5.0 (5.0, 10.0)                 | 5.0 – 58.5       | 73.7  | 8.0 (2.5, 17.8)                 | 2.5 – 81.0     | 32.3  |
| C14:1 Carnitine                  | nM/L  | 399.5 (320.0, 519.0)            | 60.0 – 1443.0    | 0.3   | 410.5 (308.2, 557.5)            | 60.0 – 3433.0  | 9.1   |
| C14 Carnitine                    | nM/L  | 125.0 (92.2, 163.0)             | 25.0 – 461.0     | 1.6   | 122.0 (98.0, 161.0)             | 25.0 – 489.0   | 1.8   |
| C16:1OH Carnitine                | nM/L  | 20.0 (10.0, 29.0)               | 10.0 – 100.0     | 48.1  | 10.0 (10.0, 26.0)               | 10.0 – 63.0    | 52.2  |
| C16 Carnitine                    | nM/L  | 309.0 (245.2, 396.0)            | 82.0 – 1027.0    |       | 271.0 (202.0, 350.8)            | 117.0 – 814.0  |       |
| C16OH Carnitine                  | nM/L  | 10.0 (10.0, 10.0)               | 10.0 – 65.0      | 89.9  | 10.0 (10.0, 10.0)               | 10.0 – 43.0    | 93.3  |
| C18OH Carnitine                  | nM/L  | 157.0 (116.0, 206.0)            | 25.0 – 514.0     | 2.8   | 140.0 (92.8, 200.0)             | 25.0 – 1354.0  | 6.2   |
| C2 Carnitine                     | nM/L  | 10.0 (10.0, 10.0)               | 10.0 – 100.0     | 82.1  | 10.0 (10.0, 10.0)               | 10.0 – 1354.0  | 85.6  |
| C3 Carnitine                     | nM/L  | 7.0 (5.4, 9.3)                  | 1.9 – 23.9       |       | Intraclass correlation < 0.4    |                |       |
| C3 Carnitine                     | nM/L  | 421.5 (323.0, 551.0)            | 101.0 – 5230.0   |       | Affected by storage conditions  |                |       |
| C3DC Malonyl/3OHB                | nM/L  | 137.0 (99.0, 216.8)             | 25.0 – 2927.0    | 1.4   | 133.0 (85.1, 187.0)             | 25.0 – 798.0   | 7.9   |
| C4 Carnitine                     | nM/L  | 212.0 (155.2, 282.0)            | 53.0 – 1394.0    | 0.1   | 131.0 (89.0, 206.8)             | 25.0 – 1416.0  | 2.9   |
| C4DC Methylmalonyl/C5OH          | nM/L  | 125.0 (100.0, 158.0)            | 50.0 – 707.0     |       | Affected by storage conditions  |                |       |
| C4DC Methylmalonyl               | nM/L  | Intraclass correlation < 0.4    |                  |       | 166.5 (132.2, 222.0)            | 64.0 – 662.0   |       |
| C5 Carnitine                     | nM/L  | 114.0 (89.0, 146.8)             | 25.0 – 1000.0    | 66.9  | 13.0 (10.0, 26.0)               | 10.0 – 85.0    | 48.7  |
| C5DC (Glutaryl) Carnitine [conf] | nM/L  | 105.0 (86.0, 133.0)             | 25.0 – 413.0     | 1.8   | 109.2 (83.2, 147.0)             | 25.0 – 10305.0 | 3.2   |
| C5DC (Glutaryl) Carnitine        | nM/L  | 135.0 (109.0, 165.8)            | 25.0 – 489.0     | 0.2   | 124.0 (95.2, 163.5)             | 25.0 – 482.0   | 1.2   |
| C5OH specific                    | nM/L  | 25.0 (25.0, 25.0)               | 25.0 – 140.0     | 76.1  | 163.5 (127.0, 230.4)            | 25.0 – 718.0   | 0.3   |
| C6 Carnitine                     | nM/L  | 52.0 (36.0, 74.0)               | 11.0 – 276.0     |       | 25.0 (25.0, 58.0)               | 25.0 – 157.0   | 68.0  |
| C6DC (methylglutaryl) Carnitine  | nM/L  | 82.0 (58.0, 112.0)              | 25.0 – 662.0     | 17.2  | 22.0 (14.0, 37.0)               | 5.0 – 113.0    | 12.0  |
| C8 Carnitine                     | nM/L  | 108.0 (70.0, 158.8)             | 5.0 – 958.0      | 0.1   | 115.0 (79.0, 177.8)             | 25.0 – 684.0   | 15.0  |
| Carnosine                        | nM/L  | Intraclass correlation < 0.4    |                  | 83.5  | Affected by storage conditions  | 5.0 – 673.0    | 0.3   |
| Citrate [conf]                   | µM/L  | Excessive missingness at random |                  |       | Excessive missingness at random |                | 1.2   |
| Citrate                          | µM/L  | Excessive missingness at random |                  |       | Excessive missingness at random |                | 1.8   |
| Citrulline                       | µM/L  | 41.0 (34.1, 50.1)               | 8.3 – 108.3      |       | 43.8 (36.8, 51.6)               | 14.5 – 128.0   | 0.3   |
| Creatine                         | µM/L  | 20.5 (14.0, 32.3)               | 4.4 – 576.0      |       | 19.6 (14.1, 28.2)               | 7.1 – 110.7    |       |
| Cystathionine [conf]             | nM/L  | 130.0 (85.0, 202.8)             | 12.5 – 3589.0    | 9.2   | Affected by storage conditions  |                | 32.6  |
| Cystathionine                    | nM/L  | 134.0 (88.0, 204.0)             | 7.5 – 3682.0     | 3.9   | Affected by storage conditions  |                | 18.8  |
| Dihydrothymine                   | µM/L  | Excessive left-censoring        |                  | 99.9  | Excessive left-censoring        |                | 98.2  |
| Dihydrouracil                    | µM/L  | Excessive left-censoring        |                  | 99.9  | Excessive left-censoring        |                |       |
| Free Carnitine                   | µM/L  | 34.2 (28.9, 40.8)               | 9.3 – 77.1       |       | Affected by storage conditions  |                | 14.4  |
| Free Cystine                     | µM/L  | 41.4 (33.3, 51.5)               | 12.9 – 113.6     |       | Affected by storage conditions  |                | 97.4  |
| Free homocystine [conf]          | µM/L  | Excessive left-censoring        |                  | 99.0  | Excessive left-censoring        |                | 98.2  |
| Free homocystine                 | µM/L  | Excessive left-censoring        |                  | 99.1  | Excessive left-censoring        |                |       |
| Free Sialic acid                 | nM/L  | 793.0 (650.5, 1014.0)           | 325.0 – 6369.0   |       | 983.0 (789.2, 1300.8)           | 336.0 – 3362.0 |       |
| Galactose-1-Phosphate [conf]     | µM/L  | Excessive missingness at random |                  |       | Excessive missingness at random |                |       |
| Galactose-1-Phosphate            | µM/L  | 0.8 (0.4, 1.4)                  | 0.1 – 9.4        | 11.1  | 0.7 (0.1, 1.6)                  | 0.1 – 15.6     | 34.3  |
| Glutamate                        | µM/L  | 61.6 (51.0, 73.2)               | 25.3 – 192.5     |       | Affected by storage conditions  |                |       |
| Glutamate/Glutamine ratio        | ratio | 0.1 (0.1, 0.1)                  | 0.1 – 0.4        |       | Affected by storage conditions  |                |       |
| Glutamine                        | µM/L  | 562.4 (503.9, 631.0)            | 284.2 – 1239.0   |       | Affected by storage conditions  |                | 3.5   |
| Glycine                          | µM/L  | 281.4 (237.5, 342.1)            | 128.0 – 791.3    |       | 312.1 (260.8, 365.5)            | 157.7 – 802.2  |       |
| Glycine/Valine ratio             | ratio | 1.2 (0.9, 1.6)                  | 0.3 – 7.7        |       | 1.3 (1.1, 1.7)                  | 0.5 – 5.5      |       |
| Guanidinoacetic acid             | µM/L  | 2.4 (1.9, 2.9)                  | 0.8 – 7.2        |       | 2.3 (1.8, 2.7)                  | 0.8 – 6.0      | 0.3   |
| Hexitol                          | µM/L  | 10.4 (7.4, 16.2)                | 3.4 – 599.2      |       | 13.8 (9.0, 21.8)                | 1.1 – 228.9    |       |
| Histidine                        | µM/L  | 84.9 (77.0, 95.5)               | 37.7 – 341.8     |       | 81.3 (70.5, 91.1)               | 38.0 – 142.0   |       |
| HMTA                             | nM/L  | Excessive left-censoring        |                  | 99.9  | Excessive left-censoring        |                | 97.9  |
| Homovanillic acid                | nM/L  | 718.0 (476.0, 1032.5)           | 125.0 – 416201.0 | 4.5   | 1057.0 (643.5, 1562.0)          | 125.0 – 4552.0 | 1.2   |
| Hydroxyproline                   | µM/L  | 12.2 (8.9, 16.8)                | 3.4 – 69.8       |       | 17.6 (13.3, 25.7)               | 3.5 – 64.9     |       |
| Hypoxanthine                     | µM/L  | 7.8 (6.1, 10.2)                 | 0.5 – 45.2       | 0.2   | 7.8 (5.5, 10.2)                 | 0.5 – 24.0     | 0.6   |

ESM Table 2: Summary characteristics of all biomarkers measured in the study (continued)

| Biomarker                         | Units      | SDRNTIBIO                       |                 |       | FinnDiane                       |                 |       |
|-----------------------------------|------------|---------------------------------|-----------------|-------|---------------------------------|-----------------|-------|
|                                   |            | Median (IQR)                    | Range           | Below | Median (IQR)                    | Range           | Below |
| Inosine                           | nM/L       | 1137.0 (530.2, 2711.1)          | 25.0 – 15287.0  | 0.3   | 1339.0 (587.0, 3068.0)          | 25.0 – 15287.0  | 3.5   |
| Isoleucine                        | µM/L       | 72.2 (57.9, 90.5)               | 21.1 – 247.6    |       | 84.8 (70.5, 100.7)              | 32.8 – 177.9    |       |
| Kynurenic acid                    | nM/L       | 61.0 (48.0, 78.0)               | 10.0 – 262.0    | 0.4   | 82.5 (62.0, 109.0)              | 28.0 – 404.0    |       |
| Kynurenine                        | µM/L       | 2.9 (2.4, 3.6)                  | 1.3 – 8.7       |       | 3.0 (2.4, 3.7)                  | 1.0 – 9.5       |       |
| Leucine/Alanine                   | ratio      | 0.3 (0.2, 0.3)                  | 0.1 – 1.1       |       | 0.3 (0.3, 0.4)                  | 0.2 – 0.7       |       |
| Leucine                           | µM/L       | 125.5 (102.0, 154.6)            | 34.1 – 426.4    |       | 151.8 (126.4, 179.9)            | 61.3 – 306.9    |       |
| Lysine                            | µM/L       | 197.3 (170.4, 223.0)            | 88.6 – 474.3    | 55.1  | 201.3 (180.9, 230.8)            | 99.3 – 368.7    |       |
| Malate                            | nM/L       | Intraclass correlation < 0.4    |                 |       | 134.8 (50.0, 202.5)             | 50.0 – 1025.0   | 32.3  |
| Methionine                        | µM/L       | 26.5 (22.2, 31.5)               | 5.8 – 71.0      |       | Affected by storage conditions  | 0.3             |       |
| Methylcitrate                     | nM/L       | 1211.5 (723.2, 2010.5)          | 125.0 – 23028.0 | 5.0   | Affected by storage conditions  | 2.3             |       |
| Methylmalonic acid                | nM/L       | 304.0 (234.0, 415.0)            | 25.0 – 76024.0  | 0.2   | 291.5 (225.0, 373.0)            | 25.0 – 1465.0   | 0.6   |
| N-acetylaspartate [conf]          | nM/L       | 1045.5 (869.5, 1238.0)          | 432.0 – 1947.0  |       | 620.5 (524.0, 757.0)            | 190.0 – 1554.0  |       |
| N-acetylaspartate                 | nM/L       | 679.0 (574.0, 808.8)            | 310.0 – 1757.0  |       | 576.0 (485.0, 750.0)            | 125.0 – 1554.0  | 0.9   |
| N-acetylglutamine [conf]          | nM/L       | Excessive missingness at random |                 |       | 446.5 (175.0, 583.2)            | 175.0 – 1146.0  | 29.0  |
| N-acetylglutamine                 | nM/L       | 392.5 (175.0, 516.5)            | 175.0 – 978.0   | 43.5  | Excessive missingness at random |                 |       |
| NAG                               | µmol/L/min | 30.0 (25.3, 35.5)               | 12.3 – 71.2     |       | 25.0 (21.2, 30.9)               | 11.0 – 64.8     | 76.0  |
| Neopterin                         | nM/L       | 7.5 (7.5, 7.5)                  | 7.5 – 32.0      | 91.2  | 7.5 (7.5, 7.5)                  | 7.5 – 53.5      | 98.2  |
| Nitrotyrosine                     | nM/L       | Excessive left-censoring        |                 | 99.9  | Excessive left-censoring        |                 |       |
| Ornithine                         | µM/L       | 100.8 (86.6, 121.8)             | 44.4 – 272.3    |       | 91.5 (79.8, 107.0)              | 36.1 – 183.4    |       |
| Orotic                            | nM/L       | Intraclass correlation < 0.4    |                 |       | Intraclass correlation < 0.4    |                 |       |
| Phenylalanine                     | µM/L       | 75.8 (67.7, 85.5)               | 34.1 – 222.5    |       | 82.4 (71.5, 93.0)               | 34.4 – 144.8    |       |
| Phosphoethanolamine               | ratio      | 1.0 (0.9, 1.2)                  | 0.5 – 3.2       |       | 1.2 (1.0, 1.4)                  | 0.6 – 2.8       |       |
| Phosphoserine [conf]              | µM/L       | Excessive left-censoring        |                 |       | Excessive left-censoring        |                 |       |
| Phosphoserine                     | µM/L       | 7.3 (5.5, 11.1)                 |                 |       |                                 |                 |       |
| Proline                           | µM/L       | Excessive left-censoring        |                 | 99.9  | Excessive left-censoring        |                 | 98.5  |
| Pyridoxal 5prime-phosphate [conf] | nM/L       | Excessive missingness at random |                 |       | Excessive missingness at random |                 | 0.6   |
| Pyridoxal 5prime-phosphate        | nM/L       | 212.9 (173.9, 257.7)            | 1.3 – 25.8      |       | Intraclass correlation < 0.4    |                 |       |
| Pyridoxal 5prime-phosphate        | nM/L       | Excessive left-censoring        |                 | 99.9  | Affected by storage conditions  |                 | 98.2  |
| Pyridoxal 5prime-phosphate        | nM/L       | Excessive left-censoring        |                 | 99.9  | Excessive left-censoring        |                 | 98.2  |
| Pyridoxal 5prime-phosphate        | nM/L       | Excessive left-censoring        |                 | 97.4  | Excessive left-censoring        |                 |       |
| Pyroglutamic acid                 | µM/L       | 25.0 (25.0, 25.0)               | 25.0 – 98.5     |       | Affected by storage conditions  |                 |       |
| Quinolnic acid                    | nM/L       | Intraclass correlation < 0.4    |                 |       | 1437.0 (1107.2, 1959.5)         | 410.0 – 10322.0 |       |
| Sarcosine                         | µM/L       | 6.1 (2.5, 8.4)                  | 2.5 – 69.5      | 42.1  | 5.7 (2.5, 7.7)                  | 2.5 – 46.1      | 38.4  |
| SDMA/ADMA                         | ratio      | 1.2 (1.1, 1.4)                  | 0.7 – 3.7       |       | 1.4 (1.2, 1.7)                  | 0.8 – 3.7       |       |
| SDMA                              | nM/L       | 546.0 (478.0, 651.8)            | 293.0 – 1881.0  |       | 686.0 (563.0, 842.0)            | 356.0 – 1766.0  |       |
| Serine                            | µM/L       | 142.1 (123.5, 165.0)            | 79.0 – 290.3    |       | 181.0 (152.0, 201.0)            | 81.0 – 359.0    |       |
| Succinate                         | µM/L       | 17.4 (14.6, 20.8)               | 5.6 – 63.0      |       | Intraclass correlation < 0.4    |                 | 0.6   |
| Succinylacetone                   | nM/L       | Excessive left-censoring        |                 | 99.9  | Excessive left-censoring        |                 | 98.5  |
| Sulphocysteine                    | nM/L       | 716.5 (590.0, 868.0)            | 100.0 – 2539.0  | 0.3   | Affected by storage conditions  |                 | 51.9  |
| Taurine                           | µM/L       | 111.7 (86.0, 143.1)             | 32.4 – 511.1    |       | 76.9 (54.5, 101.0)              | 26.7 – 215.8    |       |
| Threonine                         | µM/L       | 118.4 (95.7, 140.5)             | 30.2 – 562.8    |       | 113.1 (97.8, 134.5)             | 45.5 – 218.4    |       |
| Thymine                           | nM/L       | Excessive missingness at random |                 | 36.4  | 115.0 (50.0, 139.0)             | 50.0 – 272.0    | 20.8  |
| TMAO                              | µM/L       | 5.0 (3.0, 8.1)                  | 0.3 – 67.4      |       | 6.7 (4.5, 10.1)                 | 1.7 – 156.8     |       |
| Tryptophan                        | µM/L       | 58.9 (50.8, 67.4)               | 28.4 – 137.2    |       | Affected by storage conditions  |                 |       |
| Tryptophan/Kynurenine             | ratio      | 20.4 (16.2, 24.6)               | 5.3 – 48.1      |       | 18.5 (14.9, 23.7)               | 4.7 – 52.6      |       |
| Tyrosine                          | µM/L       | 75.1 (63.1, 90.5)               | 30.0 – 204.8    |       | 69.0 (57.5, 81.2)               | 37.6 – 137.3    | 1.2   |
| Uracil                            | nM/L       | 970.0 (768.2, 1206.0)           | 264.0 – 2677.0  | 99.9  | Intraclass correlation < 0.4    |                 | 98.5  |
| Ureidopropionate                  | nM/L       | Excessive left-censoring        |                 |       | Excessive left-censoring        |                 |       |
| Uric acid                         | µM/L       | 363.0 (295.0, 459.0)            | 79.0 – 858.0    |       | 231.0 (188.0, 279.0)            | 15.0 – 601.0    |       |
| Valine                            | µM/L       | 232.1 (197.7, 268.6)            | 69.5 – 596.5    |       | 232.8 (201.0, 272.2)            | 101.9 – 436.6   |       |
| Xanthine                          | µM/L       | 2.0 (1.7, 2.5)                  | 0.2 – 14.2      | 0.2   | 1.9 (1.5, 2.4)                  | 0.2 – 12.6      | 0.3   |
| Xanthurenic acid                  | nM/L       | 25.0 (25.0, 119.0)              | 25.0 – 579.0    | 50.9  | 77.0 (25.0, 128.4)              | 25.0 – 353.0    | 28.7  |
| ACTIN (758.9 / 765.4)             | *          | Intraclass correlation < 0.4    |                 | 0.8   | Intraclass correlation < 0.4    |                 |       |

LC-MSMS tryptic peptides

ESM Table 2: Summary characteristics of all biomarkers measured in the study (continued)

| Biomarker                                                    | Units | SDRNT1B10                    |                |       | FinnDiane                    |                  |       |
|--------------------------------------------------------------|-------|------------------------------|----------------|-------|------------------------------|------------------|-------|
|                                                              |       | Median (IQR)                 | Range          | Below | Median (IQR)                 | Range            | Below |
| Acyloxyacyl hydrolase (703.9 / 931.3)                        | *     | 193.8 (151.5, 245.2)         | 5.0 – 633.6    | 0.5   | 194.6 (123.7, 269.7)         | 19.2 – 735.6     | 0.3   |
| Afamin (416.8 / 572.4)                                       | *     | Intraclass correlation < 0.4 |                | 18.2  | Intraclass correlation < 0.4 |                  | 38.4  |
| Afamin (563.8 / 825.4)                                       | *     | Intraclass correlation < 0.4 |                | 17.6  | Intraclass correlation < 0.4 |                  | 23.8  |
| AGR2 (lung cancer biomarker) (407.7 / 701.4)                 | *     | Intraclass correlation < 0.4 |                | 1.0   | Intraclass correlation < 0.4 |                  |       |
| Albumin T31 (337.3 / 416.3)                                  | *     | Intraclass correlation < 0.4 |                | 0.4   | 1897.4 (1677.8, 2174.7)      | 417.0 – 3948.7   |       |
| Albumin T34 (441.0 / 680.5)                                  | *     | 1192.0 (1051.5, 1353.5)      | 5.0 – 2520.9   | 0.4   | 1016.5 (898.7, 1149.8)       | 290.9 – 1860.2   |       |
| Albumin T6 (575.4 / 937.4)                                   | *     | 27296.9 (24677.0, 30189.0)   | 5.0 – 476776.5 | 0.4   | 23164.3 (20356.6, 26048.2)   | 9596.2 – 47832.8 |       |
| Albumin T70 (501.2 / 587.5)                                  | *     | 4303.3 (3687.7, 4970.2)      | 5.0 – 276.8    | 0.4   | 3181.2 (2453.8, 3845.9)      | 344.5 – 7405.8   |       |
| Alpha-1-acid-glycoprotein I (723.3 / 937.4)                  | *     | 106.4 (85.9, 131.9)          | 5.0 – 980.6    | 0.4   | 90.2 (75.5, 115.7)           | 29.0 – 234.3     |       |
| Alpha-1-antichymotrypsin isoI (608.4 / 775.4)                | *     | 236.7 (192.7, 286.9)         | 5.0 – 980.6    | 0.4   | 204.4 (172.4, 241.5)         | 88.5 – 981.2     |       |
| Alpha-1-antitrypsin (444.8 / 718.4)                          | *     | 78.0 (61.9, 100.0)           | 5.0 – 205.0    | 0.4   | 74.5 (58.2, 92.3)            | 18.4 – 201.1     |       |
| Alpha-1-antitrypsin (556.4 / 797.7)                          | *     | 45.2 (34.2, 58.3)            | 5.0 – 205.5    | 0.9   | 39.9 (30.0, 53.3)            | 5.0 – 114.9      | 0.3   |
| Alpha-1-antitrypsin (631.3 / 889.5)                          | *     | 62.5 (44.5, 84.1)            | 5.0 – 193.1    | 7.1   | 47.2 (29.9, 63.8)            | 5.0 – 129.2      | 12.9  |
| Alpha-1B-glycoprotein (619.3 / 894.5)                        | *     | 84.1 (68.2, 104.0)           | 5.0 – 197.2    | 0.4   | 78.3 (62.4, 95.5)            | 5.0 – 173.0      | 0.3   |
| Alpha-1B-glycoprotein (687.4 / 960.6)                        | *     | Intraclass correlation < 0.4 |                | 4.4   | Intraclass correlation < 0.4 |                  | 2.9   |
| Alpha-2-macroglobulin (697.8 / 737.4)                        | *     | 131.5 (99.2, 164.4)          | 5.0 – 350.6    | 0.4   | 164.5 (127.3, 211.5)         | 54.9 – 460.3     |       |
| Alpha-fetoprotein (490.7 / 833.3)                            | *     | 47.0 (37.6, 57.2)            | 5.0 – 120.6    | 2.6   | 36.4 (28.8, 44.6)            | 5.0 – 95.2       | 3.5   |
| Aminopeptidase B (547.8 / 680.4)                             | *     | Intraclass correlation < 0.4 |                | 0.4   | Intraclass correlation < 0.4 |                  | 0.3   |
| Angiotensin II (349.8 / 136.1)                               | *     | 1104.0 (967.5, 1369.5)       | 5.0 – 2393.0   | 0.4   | 970.5 (830.0, 1168.4)        | 448.7 – 2117.8   |       |
| Angiotensinogen (634.9 / 956.6)                              | *     | 34.6 (25.7, 45.1)            | 5.0 – 203.9    | 6.8   | 31.1 (21.4, 42.8)            | 5.0 – 142.4      | 5.6   |
| ApoA1 (700.8 / 1023.5)                                       | *     | 419.0 (337.9, 510.4)         | 5.0 – 907.8    | 0.4   | 317.6 (249.3, 399.0)         | 44.8 – 755.4     |       |
| ApoA-II-pre (486.8 / 546.4)                                  | *     | 80.2 (65.2, 97.3)            | 5.0 – 196.6    | 0.4   | 63.9 (49.3, 77.8)            | 5.0 – 138.9      | 0.3   |
| ApoA-Q1 (626.8 / 422.2)                                      | *     | 127.9 (104.5, 156.8)         | 5.0 – 315.3    | 0.4   | 109.1 (87.8, 133.5)          | 30.5 – 233.1     |       |
| ApoB-100 (655.1 / 975.4)                                     | *     | 50.6 (38.2, 68.7)            | 5.0 – 294.9    | 2.2   | Intraclass correlation < 0.4 |                  | 2.6   |
| ApoB-Q1 (640.8 / 838.4)                                      | *     | 93.6 (73.3, 117.2)           | 5.0 – 289.3    | 0.5   | 94.4 (70.6, 116.8)           | 5.0 – 242.2      | 0.3   |
| ApoC-I (516.8 / 466.2)                                       | *     | 135.9 (102.3, 178.8)         | 5.0 – 906.0    | 0.4   | 94.5 (67.7, 140.2)           | 15.7 – 533.9     |       |
| ApoC-II (745.1 / 1149.7)                                     | *     | Intraclass correlation < 0.4 |                | 63.3  | Intraclass correlation < 0.4 |                  | 60.1  |
| ApoC-III (598.8 / 854.4)                                     | *     | 297.4 (231.7, 381.6)         | 5.0 – 1258.3   | 0.4   | 220.7 (170.9, 281.5)         | 48.2 – 1034.2    |       |
| ApoE-Q (484.8 / 588.3)                                       | *     | 72.1 (58.4, 91.5)            | 5.0 – 250.1    | 0.6   | 55.3 (42.7, 71.1)            | 5.0 – 164.7      | 0.6   |
| ApoL1 (637.8 / 932.5)                                        | *     | 24.5 (5.0, 36.3)             | 5.0 – 90.7     | 26.8  | 5.0 (5.0, 5.0)               | 5.0 – 43.0       | 93.5  |
| Beta-2-glycoprotein I (511.8 / 751.4)                        | *     | 46.4 (37.0, 58.3)            | 5.0 – 132.5    | 1.7   | 48.3 (39.1, 59.9)            | 5.0 – 131.9      | 0.3   |
| Beta-2-microglobulin (575.0 / 920.3)                         | *     | 847.0 (569.5, 1162.8)        | 5.0 – 2247.0   | 0.4   | 815.6 (512.3, 1109.5)        | 184.9 – 1922.8   |       |
| Bone morphogenetic protein 5 (723.5 / 577.3)                 | *     | 204.5 (174.8, 241.9)         | 5.0 – 618.1    | 0.4   | Intraclass correlation < 0.4 |                  |       |
| Bone morphogenetic protein 2 (481.3 / 500.4)                 | *     | 2213.5 (1982.9, 2475.4)      | 5.0 – 4531.0   | 0.4   | 1963.1 (1724.9, 2188.5)      | 388.0 – 4388.5   |       |
| BPI fold-containing family A member 2 (481.3 / 500.4)        | *     | Intraclass correlation < 0.4 |                | 0.5   | 162.7 (110.7, 196.1)         | 24.0 – 411.8     |       |
| CIQTNF1 (547.7 / 707.4)                                      | *     | 29.8 (21.4, 41.4)            | 5.0 – 99.8     | 9.5   | Intraclass correlation < 0.4 |                  | 9.7   |
| Caeruloplasmin (602.3 / 695.3)                               | *     | Intraclass correlation < 0.4 |                | 8.1   | Intraclass correlation < 0.4 |                  | 6.2   |
| Caeruloplasmin (760.1 / 1059.8)                              | *     | 72.8 (54.0, 92.5)            | 5.0 – 250.2    | 0.6   | 64.3 (48.1, 85.3)            | 5.0 – 271.1      | 0.3   |
| Caeruloplasmin (760.6 / 931.4)                               | *     | 168.3 (135.5, 210.3)         | 5.0 – 558.0    | 0.4   | 119.8 (88.0, 166.9)          | 5.0 – 343.2      | 0.6   |
| Carboxypeptidase A4 (492.9 / 399.3)                          | *     | 49.0 (39.5, 58.4)            | 5.0 – 101.2    | 0.9   | Intraclass correlation < 0.4 |                  | 2.1   |
| Carboxypeptidase M (501.8 / 874.5)                           | *     | 63.7 (49.9, 77.5)            | 5.0 – 151.3    | 0.6   | 52.4 (39.2, 64.8)            | 5.0 – 122.0      | 0.3   |
| CART std (576.2 / 705.3)                                     | *     | 33.3 (23.9, 49.2)            | 5.0 – 135.0    | 5.5   | Intraclass correlation < 0.4 |                  | 15.0  |
| Cathepsin S (359.2 / 717.4)                                  | *     | 267.1 (215.2, 326.4)         | 5.0 – 815.5    | 0.4   | Intraclass correlation < 0.4 |                  |       |
| C-C motif chemokine 14 (476.2 / 666.3)                       | *     | 186.9 (164.3, 211.4)         | 5.0 – 341.3    | 0.4   | 159.8 (141.1, 180.4)         | 69.4 – 278.5     |       |
| Cellular repressor of E1A-stimulated genes 1 (575.8 / 704.4) | *     | 36.9 (25.6, 46.9)            | 5.0 – 123.5    | 10.7  | 34.9 (25.1, 48.8)            | 5.0 – 119.6      | 11.7  |
| Chromogranin A (488.2 / 775.4)                               | *     | 55.4 (42.1, 69.9)            | 5.0 – 215.9    | 2.2   | 50.5 (40.0, 63.2)            | 5.0 – 117.2      | 0.9   |
| Chromogranin B (496.2 / 764.3)                               | *     | 70.1 (55.4, 85.0)            | 5.0 – 169.3    | 0.6   | Intraclass correlation < 0.4 |                  | 0.3   |
| Chromogranin B (579.3 / 815.4)                               | *     | Intraclass correlation < 0.4 |                | 0.8   | Intraclass correlation < 0.4 |                  | 6.2   |
| Chromogranin B (1073.5 / 822.4)                              | *     | 74.2 (59.2, 91.8)            | 5.0 – 287.0    | 0.5   | Intraclass correlation < 0.4 |                  |       |
| Clusterin (697.5 / 922.4)                                    | *     | 73.2 (58.5, 89.7)            | 5.0 – 188.5    | 0.5   | 69.9 (53.0, 88.7)            | 19.3 – 162.0     |       |
| Clusterin isoform I (559.3 / 903.5)                          | *     | Intraclass correlation < 0.4 |                | 17.6  | Intraclass correlation < 0.4 |                  | 16.1  |
| Coagulation factor IX pre (626.3 / 792.4)                    | *     | 329.0 (215.0, 432.5)         | 2.5 – 778.0    | 5.0   | 297.9 (209.0, 359.8)         | 5.0 – 675.1      | 3.8   |
| Coagulation factor V (555.8 / 898.6)                         | *     |                              |                |       |                              |                  |       |

ESM Table 2: Summary characteristics of all biomarkers measured in the study (continued)

| Biomarker                                                       | Units | SDRNT1BIO                    |              |       | FinnDiane                      |                |       |
|-----------------------------------------------------------------|-------|------------------------------|--------------|-------|--------------------------------|----------------|-------|
|                                                                 |       | Median (IQR)                 | Range        | Below | Median (IQR)                   | Range          | Below |
| Coagulation factor V (659.0 / 925.5)                            | *     | Intraclass correlation < 0.4 | 5.0 – 270.8  | 63.5  | Affected by storage conditions | 5.0 – 278.9    | 68.0  |
| Coagulation factor XIIIa HC (442.3 / 685.4)                     | *     | 123.2 (95.6, 154.9)          | 5.0 – 782.7  | 0.4   | 108.8 (83.6, 133.1)            | 5.0 – 278.9    | 0.3   |
| Coagulation factor XIIIa subcomponent subunit A (420.0 / 244.0) | *     | 224.6 (178.2, 271.4)         | 5.0 – 154.1  | 0.4   | 203.1 (160.3, 253.4)           | 63.5 – 547.0   | 0.3   |
| Complement C3 (501.8 / 731.4)                                   | *     | 64.4 (52.8, 78.2)            | 5.0 – 295.8  | 0.8   | Intraclass correlation < 0.4   | 36.8 – 241.7   | 0.3   |
| Complement C3 (673.4 / 646.4)                                   | *     | 130.5 (100.1, 155.2)         | 5.0 – 276.5  | 0.4   | 113.0 (89.9, 135.4)            | 29.8 – 218.0   | 0.3   |
| Complement C4 beta (557.8 / 629.4)                              | *     | 109.4 (88.0, 138.2)          | 5.0 – 105.2  | 0.4   | 100.3 (84.9, 128.7)            | 29.8 – 218.0   | 0.3   |
| Complement C6 (612.8 / 788.4)                                   | *     | 30.8 (5.0, 47.5)             | 5.0 – 105.2  | 32.6  | Intraclass correlation < 0.4   | 29.8 – 218.0   | 0.3   |
| Complement C7 (550.7 / 577.3)                                   | *     | Intraclass correlation < 0.4 | 5.0 – 1128.7 | 76.2  | Intraclass correlation < 0.4   | 5.0 – 106.7    | 58.4  |
| Complement C8 alpha (501.7 / 726.3)                             | *     | Intraclass correlation < 0.4 | 5.0 – 228.9  | 13.4  | 27.9 (20.6, 37.1)              | 5.0 – 106.7    | 11.7  |
| Complement C8 beta (694.9 / 942.6)                              | *     | 453.0 (360.8, 541.4)         | 5.0 – 228.9  | 0.4   | 303.0 (249.4, 380.3)           | 131.4 – 190.6  | 8.8   |
| Complement C8 beta (809.9 / 1091.5)                             | *     | 59.2 (38.7, 85.5)            | 5.0 – 228.9  | 7.0   | 49.5 (23.4, 73.5)              | 5.0 – 109.6    | 55.7  |
| Complement C8 gamma (810.9 / 836.4)                             | *     | Intraclass correlation < 0.4 | 5.0 – 610.8  | 43.4  | Intraclass correlation < 0.4   | 74.8 – 557.0   | 0.3   |
| Complement factor B (578.3 / 671.4)                             | *     | 235.1 (187.8, 292.0)         | 5.0 – 741.5  | 0.4   | 219.8 (173.8, 292.2)           | 74.8 – 557.0   | 0.3   |
| Complement Factor I (1007.5 / 1023.5)                           | *     | 171.5 (95.0, 386.6)          | 5.0 – 741.5  | 0.5   | Intraclass correlation < 0.4   | 5.0 – 385.5    | 0.3   |
| Corticosteroid-binding globulin (539.1 / 517.3)                 | *     | Intraclass correlation < 0.4 | 5.0 – 3990.0 | 1.0   | Intraclass correlation < 0.4   | 400.9 – 3403.0 | 0.3   |
| C-reactive protein (564.8 / 609.4)                              | *     | Intraclass correlation < 0.4 | 5.0 – 1898.5 | 0.8   | Intraclass correlation < 0.4   | 5.0 – 1025.4   | 0.3   |
| C-reactive protein (569.7 / 829.3)                              | *     | 93.0 (74.9, 116.1)           | 5.0 – 234.1  | 0.8   | Intraclass correlation < 0.4   | 5.0 – 1025.4   | 0.3   |
| C-reactive protein iso1 (696.9 / 1035.6)                        | *     | Intraclass correlation < 0.4 | 5.0 – 385.5  | 0.8   | Intraclass correlation < 0.4   | 5.0 – 1025.4   | 0.3   |
| Cystatin C (685.0 / 412.1)                                      | *     | 143.4 (117.5, 178.3)         | 5.0 – 3990.0 | 28.1  | Intraclass correlation < 0.4   | 5.0 – 1025.4   | 0.3   |
| E-selectin (613.8 / 982.5)                                      | *     | 2040.0 (1845.5, 2283.0)      | 5.0 – 1898.5 | 19.8  | Intraclass correlation < 0.4   | 5.0 – 1025.4   | 0.3   |
| Extracellular glycoprotein lactrin (481.3 / 501.3)              | *     | 340.0 (242.1, 451.3)         | 5.0 – 1898.5 | 0.6   | Intraclass correlation < 0.4   | 5.0 – 1025.4   | 0.3   |
| Fas (TNFRSF6) associated factor 1 (607.8 / 786.5)               | *     | Intraclass correlation < 0.4 | 5.0 – 980.4  | 0.4   | 1797.4 (1562.7, 2034.6)        | 5.0 – 1025.4   | 1.2   |
| Ferritin HC (673.3 / 1035.5)                                    | *     | Intraclass correlation < 0.4 | 5.0 – 980.4  | 1.4   | 6138.0 (3942.0, 7832.5)        | 5.0 – 1025.4   | 1.2   |
| Fetuin-B (498.4 / 467.3)                                        | *     | Intraclass correlation < 0.4 | 5.0 – 980.4  | 0.4   | Intraclass correlation < 0.4   | 5.0 – 1025.4   | 1.2   |
| Fibronectin iso1 (536.3 / 680.4)                                | *     | 66.4 (45.0, 101.5)           | 5.0 – 980.4  | 27.5  | Intraclass correlation < 0.4   | 5.0 – 1025.4   | 1.2   |
| Fractalkine (612.8 / 977.5)                                     | *     | 49.5 (34.9, 67.1)            | 2.5 – 157.2  | 1.2   | 39.8 (24.6, 63.5)              | 5.0 – 408.3    | 6.2   |
| Haptoglobin (490.5 / 562.6)                                     | *     | 157.1 (110.6, 216.2)         | 5.0 – 711.9  | 8.1   | 44.7 (31.0, 59.7)              | 5.0 – 168.0    | 7.9   |
| Haptoglobin (599.4 / 658.4)                                     | *     | 145.8 (110.7, 184.4)         | 5.0 – 598.0  | 0.5   | 138.9 (95.8, 190.7)            | 25.8 – 590.8   | 1.2   |
| Haptoglobin (602.8 / 803.7)                                     | *     | 123.4 (94.7, 161.4)          | 5.0 – 514.9  | 0.9   | 120.1 (78.5, 170.0)            | 5.0 – 537.6    | 1.2   |
| Haptoglobin beta chain (490.8 / 562.3)                          | *     | Intraclass correlation < 0.4 | 5.0 – 209.5  | 1.2   | 105.7 (80.7, 135.0)            | 11.6 – 372.9   | 1.2   |
| Heat shock protein 60kDa (456.8 / 515.4)                        | *     | 72.6 (56.3, 94.2)            | 5.0 – 209.5  | 1.1   | 789.3 (537.7, 1034.9)          | 114.5 – 3028.0 | 1.2   |
| Heat shock protein 90alpha iso1 (675.4 / 921.5)                 | *     | 5.0 (5.0, 5.0)               | 5.0 – 60.2   | 73.4  | 65.4 (53.1, 80.5)              | 5.0 – 178.3    | 72.7  |
| Hemopexin (571.5 / 650.4)                                       | *     | 204.0 (168.0, 252.0)         | 5.0 – 505.0  | 0.4   | Intraclass correlation < 0.4   | 83.9 – 365.2   | 0.3   |
| Hemopexin (610.8 / 959.6)                                       | *     | 929.0 (808.5, 1054.5)        | 5.0 – 1913.0 | 0.4   | 176.3 (146.6, 212.2)           | 354.0 – 1559.6 | 0.3   |
| Heparin cofactor II (514.8 / 814.4)                             | *     | 81.1 (67.0, 98.0)            | 5.0 – 335.4  | 0.4   | 802.0 (651.7, 933.8)           | 33.9 – 203.4   | 0.3   |
| Hyaluronan-binding protein 2 (575.2 / 901.5)                    | *     | 197.6 (169.7, 226.7)         | 5.0 – 335.4  | 0.4   | 172.2 (145.4, 195.1)           | 69.7 – 321.7   | 0.3   |
| Ig gamma-1 chain C region (594.0 / 698.7)                       | *     | 91.5 (65.2, 157.2)           | 5.0 – 335.5  | 0.4   | Intraclass correlation < 0.4   | 69.7 – 321.7   | 0.3   |
| Immunoglobulin J chain (695.5 / 971.4)                          | *     | 40.7 (25.4, 58.6)            | 5.0 – 141.1  | 16.4  | 38.4 (23.6, 51.6)              | 5.0 – 134.8    | 8.2   |
| Inhibin beta B chain (594.8 / 419.3)                            | *     | 97.5 (79.4, 117.5)           | 5.0 – 239.0  | 0.4   | 91.1 (74.0, 110.4)             | 5.0 – 221.6    | 0.3   |
| Inter-alpha-trypsin inhibitor HC (579.3 / 902.5)                | *     | 159.6 (130.3, 202.4)         | 5.0 – 625.4  | 0.4   | 129.2 (96.2, 163.6)            | 31.4 – 1012.4  | 16.4  |
| Interleukin-26 (575.2 / 512.3)                                  | *     | 20.4 (13.8, 27.2)            | 5.0 – 77.1   | 15.6  | Intraclass correlation < 0.4   | 44.1 – 231.5   | 48.4  |
| Kallistatin (643.4 / 971.6)                                     | *     | 143.3 (119.6, 166.2)         | 5.0 – 275.1  | 0.4   | 111.7 (90.1, 134.8)            | 42.4 – 189.0   | 0.3   |
| Kinogen-1 (626.3 / 173.1)                                       | *     | 340.2 (289.4, 407.1)         | 5.0 – 857.7  | 0.4   | 85.7 (73.2, 103.4)             | 42.4 – 189.0   | 0.3   |
| Leucine-rich alpha-2-glycoprotein (590.5 / 725.4)               | *     | Intraclass correlation < 0.4 | 5.0 – 357.2  | 0.4   | Affected by storage conditions | 43.7 – 2840.0  | 33.4  |
| MPO (575.3 / 939.4)                                             | *     | 141.6 (115.9, 173.6)         | 5.0 – 168.1  | 55.8  | 128.1 (102.5, 159.6)           | 43.7 – 2840.0  | 33.4  |
| Osteopontin isoA (694.3 / 853.4)                                | *     | 5.0 (5.0, 34.6)              | 5.0 – 556.3  | 0.4   | Intraclass correlation < 0.4   | 66.2 – 347.1   | 2.1   |
| Pericentriolar material 1 (526.3 / 825.5)                       | *     | 241.2 (191.0, 296.7)         | 5.0 – 167.2  | 2.1   | 163.5 (130.9, 206.0)           | 5.0 – 117.3    | 16.1  |
| Peroxidase (492.6 / 703.3)                                      | *     | 49.7 (39.0, 64.4)            | 5.0 – 93.5   | 9.8   | 48.2 (37.0, 61.1)              | 5.0 – 100.3    | 0.3   |
| Peroxiredoxin 2 (489.8 / 735.4)                                 | *     | 30.3 (21.3, 42.9)            | 5.0 – 617.5  | 0.6   | 26.8 (18.0, 38.1)              | 5.0 – 100.3    | 0.3   |
| Peroxiredoxin 2 (489.8 / 735.4)                                 | *     | 140.0 (107.2, 186.0)         | 5.0 – 617.5  | 0.6   | 115.8 (86.0, 160.1)            | 5.0 – 344.8    | 0.3   |



ESM Table 2: Summary characteristics of all biomarkers measured in the study (continued)

| Biomarker                                                        | Units | SDRNT1B10                    |              |       | FinnDiane                    |                 |       |
|------------------------------------------------------------------|-------|------------------------------|--------------|-------|------------------------------|-----------------|-------|
|                                                                  |       | Median (IQR)                 | Range        | Below | Median (IQR)                 | Range           | Below |
| Phosphatidylcholine-sterol acyltransferase (693.7 / 941.5)       | *     | 28.3 (17.5, 44.4)            | 5.0 – 291.7  | 18.6  | 26.7 (12.6, 53.3)            | 5.0 – 146.5     | 20.5  |
| Plasma glutamate carboxypeptidase (577.3 / 743.3)                | *     | Intraclass correlation < 0.4 |              | 48.4  | Intraclass correlation < 0.4 |                 | 41.9  |
| Plasma protease C1 inhibitor (633.0 / 1049.6)                    | *     | 56.5 (44.9, 71.5)            | 5.0 – 288.6  | 1.0   | Intraclass correlation < 0.4 |                 | 0.3   |
| Plasminogen (438.3 / 502.3)                                      | *     | 28.6 (20.7, 36.4)            | 5.0 – 85.2   | 11.5  | Intraclass correlation < 0.4 |                 | 8.2   |
| Plasminogen (438.3 / 615.3)                                      | *     | 31.0 (261.5, 379.5)          | 5.0 – 2073.0 | 0.4   | 294.1 (247.7, 347.9)         | 118.7 – 1190.0  |       |
| Plasminogen (570.8 / 699.4)                                      | *     | 92.0 (75.0, 111.0)           | 5.0 – 225.1  | 0.5   | 84.6 (72.6, 103.9)           | 32.9 – 195.2    |       |
| Polymerase (RNA) II polypeptide D (425.2 / 635.3)                | *     | 36.9 (26.6, 48.0)            | 5.0 – 137.0  | 5.1   | 33.0 (22.9, 45.3)            | 5.0 – 131.6     | 7.0   |
| PON1 Serum paraoxonase/arylesterase 2 (942.5 / 472.3)            | *     | 234.0 (174.0, 317.0)         | 5.0 – 869.0  | 0.4   | 250.0 (174.6, 372.9)         | 52.7 – 666.8    |       |
| Prothrombin (626.3 / 679.4)                                      | *     | 45.4 (34.9, 57.6)            | 5.0 – 117.2  | 1.9   | Intraclass correlation < 0.4 |                 | 2.1   |
| Prothrombin (626.3 / 879.5)                                      | *     | 39.0 (30.0, 50.2)            | 5.0 – 108.7  | 3.6   | Intraclass correlation < 0.4 |                 | 2.6   |
| P-selectin (500.2 / 492.3)                                       | *     | 18.1 (5.0, 33.2)             | 5.0 – 456.5  | 31.9  | Intraclass correlation < 0.4 |                 | 32.8  |
| P-selectin (712.4 / 876.5)                                       | *     | Intraclass correlation < 0.4 |              | 15.9  | 17.4 (5.0, 134.6)            | 5.0 – 366.2     | 7.9   |
| RBP1 (367.2 / 505.3)                                             | *     | Intraclass correlation < 0.4 |              | 55.2  | Intraclass correlation < 0.4 |                 | 70.4  |
| Retinal binding protein 2 (575.8 / 695.3)                        | *     | 4156.2 (3666.6, 4584.2)      | 5.0 – 6884.7 | 0.4   | 3571.3 (3086.9, 3986.7)      | 1725.1 – 6580.2 |       |
| RBP4 (481.2 / 833.4)                                             | *     | Intraclass correlation < 0.4 |              | 0.4   | 136.9 (101.4, 183.0)         | 29.1 – 333.8    |       |
| RBP (583.3 / 669.5)                                              | *     | 59.3 (44.2, 78.6)            | 5.0 – 219.6  | 0.9   | 67.4 (53.2, 91.8)            | 12.6 – 230.4    |       |
| Renin isoform1 (520.8 / 502.3)                                   | *     | 86.1 (59.4, 120.2)           | 5.0 – 321.5  | 0.6   | 67.2 (34.5, 105.1)           | 5.0 – 224.7     | 0.9   |
| Renin isoform1 (610.3 / 959.4)                                   | *     | 41.7 (24.3, 107.0)           | 5.0 – 474.3  | 7.1   | Intraclass correlation < 0.4 |                 | 5.3   |
| Reticulon-4 isoform1 (618.8 / 894.5)                             | *     | 13.6 (5.0, 21.5)             | 2.5 – 86.9   | 34.5  | Intraclass correlation < 0.4 |                 | 30.5  |
| sCD40L (471.2 / 837.4)                                           | *     | 122.8 (97.7, 152.2)          | 5.0 – 351.5  | 0.4   | Intraclass correlation < 0.4 |                 |       |
| Serotransferrin (489.9 / 735.4)                                  | *     | 164.0 (129.8, 215.1)         | 5.0 – 602.5  | 0.4   | 133.3 (100.5, 174.7)         | 47.2 – 366.0    |       |
| Serotransferrin (625.5 / 675.4)                                  | *     | 330.4 (255.4, 419.8)         | 5.0 – 866.0  | 0.5   | 265.6 (210.1, 335.8)         | 72.6 – 696.5    |       |
| Serum Amyloid A (739.4 / 1151.6)                                 | *     | Intraclass correlation < 0.4 |              | 21.1  | Intraclass correlation < 0.4 |                 | 21.7  |
| Serum amyloid P-component (578.8 / 508.3)                        | *     | Intraclass correlation < 0.4 |              | 0.9   | Intraclass correlation < 0.4 |                 | 0.3   |
| Somatostatin receptor type 2-P30874 (575.8 / 674.4)              | *     | 97.0 (81.4, 114.5)           | 5.0 – 207.9  | 0.4   | 81.5 (68.7, 98.2)            | 31.5 – 154.5    | 0.6   |
| TAO kinase 1 (645.3 / 804.4)                                     | *     | 78.8 (58.8, 98.2)            | 5.0 – 200.8  | 0.6   | 60.9 (48.6, 77.8)            | 5.0 – 160.5     | 6.7   |
| Thyroxine binding globulin (530.8 / 244.1)                       | *     | 51.0 (28.1, 111.4)           | 5.0 – 527.5  | 7.9   | Intraclass correlation < 0.4 |                 | 34.9  |
| Thyroxine-binding globulin (801.1 / 993.9)                       | *     | 77.2 (56.3, 99.5)            | 5.0 – 210.8  | 1.4   | Intraclass correlation < 0.4 |                 | 0.9   |
| TNF alpha (691.9 / 1067.7)                                       | *     | 67.1 (54.6, 83.2)            | 5.0 – 204.1  | 1.2   | Intraclass correlation < 0.4 |                 |       |
| TNFRSF9 (409.7 / 519.3)                                          | *     | 572.8 (421.8, 715.1)         | 5.0 – 4890.7 | 0.5   | 598.7 (350.3, 820.6)         | 101.4 – 3230.4  |       |
| Transferrin (489.7 / 735.4)                                      | *     | 138.9 (106.1, 179.0)         | 5.0 – 619.0  | 0.5   | 109.9 (84.7, 157.2)          | 29.5 – 409.3    | 0.9   |
| Transferrin (598.3 / 993.5)                                      | *     | 72.3 (56.2, 88.8)            | 5.0 – 180.4  | 1.3   | 58.5 (46.2, 73.8)            | 5.0 – 183.7     |       |
| Troponin I (581.8 / 935.4)                                       | *     | Intraclass correlation < 0.4 |              | 0.4   | 271.4 (168.1, 361.2)         | 37.1 – 832.9    |       |
| Ubiquinol-cytochrome c reductase core protein II (547.3 / 639.3) | *     | Intraclass correlation < 0.4 |              | 0.4   | 91.5 (70.8, 113.7)           | 25.3 – 251.3    |       |
| Vitamin K-dependent protein C (516.3 / 603.3)                    | *     | Intraclass correlation < 0.4 |              | 0.8   | 1069.0 (658.1, 1377.4)       | 162.5 – 2569.7  | 30.8  |
| Vit D binding (628.2 / 691.3)                                    | *     | 62.3 (49.9, 74.9)            | 5.0 – 167.3  | 0.2   | Intraclass correlation < 0.4 |                 | 53.1  |
| Vit D binding (628.2 / 691.3)                                    | *     | 70.0 (52.9, 87.8)            | 5.0 – 209.0  | 1.2   | Intraclass correlation < 0.4 |                 |       |
| Vitronectin (711.8 / 647.3)                                      | *     | 98.7 (82.6, 119.5)           | 5.0 – 320.4  | 0.4   | 86.9 (74.7, 104.5)           | 38.2 – 200.5    |       |
| Von Willebrand factor (500.8 / 788.4)                            | *     | 57.8 (46.4, 70.0)            | 5.0 – 120.9  | 1.5   | 67.9 (57.1, 81.2)            | 24.6 – 138.5    | 3.2   |
| WD repeat domain 67-iso1 (487.8 / 604.3)                         | *     | 44.4 (33.9, 55.6)            | 5.0 – 130.0  | 4.7   | 44.4 (33.3, 55.5)            | 5.0 – 119.6     |       |
| Zinc-alpha-2-glycoprotein (697.8 / 789.4)                        | *     | 51.4 (34.0, 68.3)            | 5.0 – 172.6  | 11.5  | Intraclass correlation < 0.4 |                 | 8.5   |

Note:

Biomarkers that were not analyzed report the reason for their exclusion from the analysis

An \* indicates that the value is a ratio of the biomarker to a stable isotope of albumin T6

Metabolites with “[conf]” in their name represent confidence transitions

“Below” reports the percentage of observations with levels below the detection threshold

ESM Table 3: Associations of each biomarker (considered separately) with achieved eGFR from linear regression models adjusted for age, sex, duration of diabetes, study day eGFR, length of follow-up and ACR category

| Biomarker                                          | SDRNT1BIO            |          | FinnDiane            |          |
|----------------------------------------------------|----------------------|----------|----------------------|----------|
|                                                    | Coefficient (95% CI) | <i>p</i> | Coefficient (95% CI) | <i>p</i> |
| <b>Luminex proteins</b>                            |                      |          |                      |          |
| CD27 antigen                                       | -0.22 (-0.27, -0.17) | 2E-16    | -0.34 (-0.46, -0.23) | 9E-09    |
| Kidney Injury Molecule-1                           | -0.16 (-0.21, -0.11) | 6E-10    | -0.27 (-0.37, -0.18) | 6E-08    |
| Alpha-1-Microglobulin                              | -0.18 (-0.24, -0.13) | 2E-11    | -0.26 (-0.36, -0.16) | 4E-07    |
| Beta-2-Microglobulin                               | -0.22 (-0.27, -0.17) | 1E-15    | -0.26 (-0.37, -0.14) | 1E-05    |
| Cystatin-C                                         | -0.23 (-0.29, -0.18) | 3E-15    | -0.20 (-0.31, -0.09) | 3E-04    |
| Thrombomodulin                                     | -0.19 (-0.24, -0.14) | 3E-12    | -0.22 (-0.32, -0.11) | 5E-05    |
| Tumor Necrosis Factor Receptor 1                   | -0.17 (-0.22, -0.12) | 1E-10    | -0.20 (-0.30, -0.09) | 3E-04    |
| Osteopontin                                        | -0.12 (-0.17, -0.07) | 1E-06    | -0.18 (-0.28, -0.08) | 7E-04    |
| Interleukin-2 receptor alpha                       | -0.16 (-0.20, -0.11) | 2E-10    | -0.11 (-0.21, -0.01) | 3E-02    |
| Fibroblast Growth Factor 21                        | -0.11 (-0.15, -0.06) | 5E-06    | -0.15 (-0.25, -0.06) | 1E-03    |
| N-terminal prohormone of brain natriuretic peptide | -0.12 (-0.17, -0.07) | 6E-06    | 0.00 (-0.10, 0.09)   | 9E-01    |
| Tamm-Horsfall Urinary Glycoprotein                 | 0.11 (0.06, 0.15)    | 3E-05    | 0.09 (-0.01, 0.18)   | 8E-02    |
| Trefoil Factor 3                                   | -0.11 (-0.16, -0.06) | 2E-05    | <i>Not tested</i>    |          |
| <b>LC-MSMS metabolites</b>                         |                      |          |                      |          |
| Free Sialic acid                                   | -0.20 (-0.26, -0.15) | 2E-12    | -0.21 (-0.33, -0.08) | 1E-03    |
| SDMA                                               | -0.15 (-0.21, -0.09) | 2E-07    | -0.21 (-0.33, -0.09) | 6E-04    |
| Tryptophan/Kynurenine                              | 0.17 (0.12, 0.22)    | 3E-10    | 0.08 (-0.03, 0.18)   | 2E-01    |
| C5DC (Glutaryl) Carnitine                          | -0.11 (-0.16, -0.06) | 4E-05    | -0.07 (-0.18, 0.04)  | 2E-01    |
| Free Cystine                                       | -0.11 (-0.16, -0.05) | 7E-05    | <i>Not tested</i>    |          |
| Tryptophan                                         | 0.11 (0.07, 0.16)    | 2E-06    | <i>Not tested</i>    |          |
| Methionine                                         | 0.10 (0.05, 0.14)    | 3E-05    | <i>Not tested</i>    |          |
| <b>LC-MSMS tryptic peptides</b>                    |                      |          |                      |          |
| Albumin T70 (501.2 / 587.5)                        | 0.10 (0.05, 0.14)    | 3E-05    | -0.01 (-0.10, 0.08)  | 8E-01    |
| Chromogranin A (488.2 / 775.4)                     | -0.10 (-0.14, -0.05) | 3E-05    | 0.00 (-0.09, 0.09)   | 1E+00    |

Regression coefficients are per unit of standard deviation of gaussianised biomarker

We report median and interquartile range (IQR) for continuous variables, and frequency for categorical variables

ESM Table 4: Associations of each biomarker (considered separately) with achieved eGFR from linear regression models adjusted for full clinical covariates

| Biomarker                        | SDRNT1BIO            |          | FinnDiane            |          |
|----------------------------------|----------------------|----------|----------------------|----------|
|                                  | Coefficient (95% CI) | <i>p</i> | Coefficient (95% CI) | <i>p</i> |
| <b>Luminex proteins</b>          |                      |          |                      |          |
| CD27 antigen                     | -0.17 (-0.22, -0.12) | 9E-12    | -0.32 (-0.43, -0.21) | 4E-08    |
| Beta-2-Microglobulin             | -0.16 (-0.21, -0.11) | 2E-09    | -0.26 (-0.37, -0.15) | 9E-06    |
| Alpha-1-Microglobulin            | -0.14 (-0.19, -0.09) | 1E-07    | -0.23 (-0.32, -0.13) | 5E-06    |
| Kidney Injury Molecule-1         | -0.14 (-0.19, -0.10) | 6E-09    | -0.23 (-0.33, -0.13) | 6E-06    |
| Cystatin-C                       | -0.17 (-0.22, -0.11) | 2E-09    | -0.22 (-0.33, -0.12) | 5E-05    |
| Osteopontin                      | -0.09 (-0.14, -0.05) | 9E-05    | -0.19 (-0.29, -0.09) | 2E-04    |
| Thrombomodulin                   | -0.14 (-0.18, -0.09) | 1E-07    | -0.19 (-0.29, -0.09) | 2E-04    |
| Tumor Necrosis Factor Receptor 1 | -0.12 (-0.17, -0.08) | 2E-07    | -0.19 (-0.29, -0.09) | 3E-04    |
| Interleukin-2 receptor alpha     | -0.11 (-0.16, -0.07) | 1E-06    | -0.11 (-0.21, -0.02) | 2E-02    |
| <b>LC-MSMS metabolites</b>       |                      |          |                      |          |
| SDMA                             | -0.11 (-0.16, -0.06) | 3E-05    | -0.21 (-0.33, -0.10) | 3E-04    |
| Free Sialic acid                 | -0.14 (-0.19, -0.08) | 6E-07    | -0.18 (-0.30, -0.05) | 6E-03    |
| Tryptophan/Kynurenine            | 0.14 (0.09, 0.18)    | 6E-08    | 0.11 (0.00, 0.21)    | 5E-02    |
| Tryptophan                       | 0.09 (0.04, 0.13)    | 6E-05    | <i>Not tested</i>    |          |

Regression coefficients are per unit of standard deviation of gaussianised biomarker

We report median and interquartile range (IQR) for continuous variables, and frequency for categorical variables

Full clinical covariates: age, sex, diabetes duration, study day eGFR, length of follow-up, categorical ACR,

BMI, DBP, SBP, HbA1c, HDL-cholesterol, total cholesterol, smoking status, weighted average of historical eGFR

ESM Table 5: Ranking of the top biomarkers for prediction of achieved eGFR produced by the projective selection approach from linear regression models adjusted for age, sex, duration of diabetes, study day eGFR, and length of follow-up

| #                     | SDRNT1B10                                           | FinnDiane                                 |
|-----------------------|-----------------------------------------------------|-------------------------------------------|
| <b>Luminex</b>        |                                                     |                                           |
| 1                     | CD27 antigen                                        | CD27 antigen                              |
| 2                     | Kidney Injury Molecule-1                            | Kidney Injury Molecule-1                  |
| 3                     | Cystatin-C                                          | Tamm-Horsfall Urinary Glycoprotein        |
| 4                     | Tamm-Horsfall Urinary Glycoprotein                  | Alpha-1-Microglobulin                     |
| 5                     | Tumor Necrosis Factor Receptor 1                    | Fibroblast Growth Factor 23               |
| 6                     | Thrombomodulin                                      | Osteopontin                               |
| 7                     | N-terminal prohormone of brain natriuretic peptide  | Tissue Inhibitor of Metalloproteinases 1  |
| 8                     | Alpha-1-Microglobulin                               | Latency-Associated-Peptide                |
| 9                     | Osteopontin                                         | Thrombomodulin                            |
| 10                    | Lectin-Like Oxidized LDL Receptor 1                 | Growth-Regulated alpha protein            |
| <b>LC-MSMS</b>        |                                                     |                                           |
| 1                     | Free Sialic acid                                    | Free Sialic acid                          |
| 2                     | Albumin T70 (501.2 / 587.5)                         | Beta-2-microglobulin (575.0 / 920.3)      |
| 3                     | Tryptophaan/Kyurenine                               | Heat shock protein 60kDa (456.8 / 515.4)  |
| 4                     | Chromogranin A (488.2 / 775.4)                      | SDMA                                      |
| 5                     | Hydroxyproline                                      | Retinal binding protein 2 (575.8 / 695.3) |
| 6                     | Osteopontin isoA (694.3 / 853.4)                    | Xanthine                                  |
| 7                     | Extracellular glycoprotein lacritin (481.3 / 501.3) | Alpha-2-macroglobulin (697.8 / 737.4)     |
| 8                     | SDMA                                                | Hexitol                                   |
| 9                     | ApoC-III (598.8 / 854.4)                            | Glycine/Valine                            |
| 10                    | Tyrosine                                            | Alpha-fetoprotein (490.7 / 833.3)         |
| <b>Both platforms</b> |                                                     |                                           |
| 1                     | CD27 antigen                                        | CD27 antigen                              |
| 2                     | Kidney Injury Molecule-1                            | Kidney Injury Molecule-1                  |
| 3                     | Free Sialic acid                                    | Beta-2-microglobulin (575.0 / 920.3)      |
| 4                     | Angiotensin II (349.8 / 136.1)                      | SDMA                                      |
| 5                     | Thrombomodulin                                      | Histidine                                 |
| 6                     | Tryptophaan/Kyurenine                               | Alpha-1-Microglobulin                     |
| 7                     | 3-Methyl-histidine                                  | Serotransferrin (625.5 / 675.4)           |
| 8                     | Histidine                                           | Fibronectin iso1 (536.3 / 680.4)          |
| 9                     | Citrulline                                          | Free Sialic acid                          |
| 10                    | Heparin cofactor II (514.8 / 814.4)                 | Thrombomodulin                            |

**Physicians and nurses at health care centers participating in the collection of FinnDiane patients.**

| <b>FinnDiane Study Centers</b>                                                       | <b>Physicians and nurses</b>                                                                                                                                                                                                                                  |
|--------------------------------------------------------------------------------------|---------------------------------------------------------------------------------------------------------------------------------------------------------------------------------------------------------------------------------------------------------------|
| Anjalankoski Health Centre                                                           | S. Koivula, T. Uggeldahl                                                                                                                                                                                                                                      |
| Central Finland Central Hospital, Jyväskylä                                          | T. Forslund, A. Halonen, A. Koistinen, P. Koskiahho, M. Laukkanen, J. Saltevo, M. Tiihonen                                                                                                                                                                    |
| Central Hospital of Åland Islands, Mariehamn                                         | M. Forsen, H. Granlund, A-C. Jonsson, B. Nyroos                                                                                                                                                                                                               |
| Central Hospital of Kanta-Häme, Hämeenlinna                                          | P. Kinnunen, A. Orvola, T. Salonen, A. Vähänen                                                                                                                                                                                                                |
| Central Hospital of Länsi-Pohja, Kemi                                                | H. Laukkanen, P. Nyländen, A. Sademies                                                                                                                                                                                                                        |
| Central Ostrabothnian Hospital District, Kokkola                                     | S. Anderson, B. Asplund, U. Byskata, P. Liedes, M. Kuusela, T. Virkkala                                                                                                                                                                                       |
| City of Espoo Health Centre                                                          |                                                                                                                                                                                                                                                               |
| Espoonlahti                                                                          | A. Nikkola, E. Ritola                                                                                                                                                                                                                                         |
| Tapiola                                                                              | M. Niska, H. Saarinen                                                                                                                                                                                                                                         |
| Samaria                                                                              | E. Oukko-Ruonen, T. Virtanen                                                                                                                                                                                                                                  |
| Viherlaakso                                                                          | A. Lyytinen                                                                                                                                                                                                                                                   |
| City of Helsinki Health Centre                                                       |                                                                                                                                                                                                                                                               |
| Puistola                                                                             | H. Kari, T. Simonen                                                                                                                                                                                                                                           |
| Suutarila                                                                            | A. Kaprio, J. Kärkkäinen, B. Rantaeskola                                                                                                                                                                                                                      |
| Töölö                                                                                | P. Kääriäinen, J. Haaga, A-L. Pietiläinen                                                                                                                                                                                                                     |
| City of Hyvinkää Health Centre                                                       | S. Klemetti, T. Nyandoto, E. Rontu, S. Satuli-Autere                                                                                                                                                                                                          |
| City of Vantaa Health Centre                                                         |                                                                                                                                                                                                                                                               |
| Korso                                                                                | R. Toivonen, H. Virtanen                                                                                                                                                                                                                                      |
| Länsimäki                                                                            | R. Ahonen, M. Ivaska-Suomela, A. Jauhiainen                                                                                                                                                                                                                   |
| Martinlaakso                                                                         | M. Laine, T. Pellonpää, R. Puranen                                                                                                                                                                                                                            |
| Myyrmäki                                                                             | A. Airas, J. Laakso, K. Rautavaara                                                                                                                                                                                                                            |
| Rekola                                                                               | M. Erola, E. Jatkola                                                                                                                                                                                                                                          |
| Tikkurila                                                                            | R. Lönnblad, A. Malm, J. Mäkelä, E. Rautamo                                                                                                                                                                                                                   |
| Heinola Health Centre                                                                | P. Hentunen, J. Lagerstam                                                                                                                                                                                                                                     |
| Helsinki University Central Hospital, Department of Medicine, Division of Nephrology | A. Ahola, J. Fagerudd, M. Feodoroff, D. Gordin, O. Heikkilä, K. Hietala, L. Kyllönen, J. Kytö, S. Lindh, K. Pettersson-Fernholm, M. Rosengård-Bärlund, M. Rönnback, A. Sandelin, A-R Salonen, L. Salovaara, L. Thorn, J. Tuomikangas, T. Vesisenaho, J. Wadén |
| Herttoniemi Hospital, Helsinki                                                       | V. Sipilä                                                                                                                                                                                                                                                     |
| Hospital of Lounais-Häme, Forssa                                                     | T. Kalliomäki, J. Koskelainen, R. Nikkanen, N. Savolainen, H. Sulonen, E. Valtonen                                                                                                                                                                            |
| Iisalmi Hospital                                                                     | E. Toivanen                                                                                                                                                                                                                                                   |
| Jokilaakso Hospital, Jämsä                                                           | A. Parta, I. Pirttiniemi                                                                                                                                                                                                                                      |
| Jorvi Hospital, Helsinki University Central Hospital                                 | S. Aranko, S. Ervasti, R. Kauppinen-Mäkelin, A. Kuusisto, T. Leppälä, K. Nikkilä, L. Pekkonen                                                                                                                                                                 |
| Jyväskylä Health Centre, Kyllö                                                       | K. Nuorva, M. Tiihonen                                                                                                                                                                                                                                        |
| Kainuu Central Hospital, Kajaani                                                     | S. Jokelainen, P. Kemppainen, A-M. Mankinen, M. Sankari                                                                                                                                                                                                       |
| Kerava Health Centre                                                                 | H. Stuckey, P. Suominen                                                                                                                                                                                                                                       |
| Kirkkonummi Health Centre                                                            | A. Lappalainen, M. Liimatainen, J. Santaholma                                                                                                                                                                                                                 |
| Kivelä Hospital, Helsinki                                                            | A. Aimolahti, E. Huovinen                                                                                                                                                                                                                                     |
| Koskela Hospital, Helsinki                                                           | V. Ilkka, M. Lehtimäki                                                                                                                                                                                                                                        |
| Kotka Health Centre                                                                  | E. Pälikkö-Kontinen, A. Vanhanen                                                                                                                                                                                                                              |
| Kouvola Health Centre                                                                | E. Koskinen, T. Siitonen                                                                                                                                                                                                                                      |

| <b>FinnDiane Study Centers</b>               | <b>Physicians and nurses</b>                                                                                                                                 |
|----------------------------------------------|--------------------------------------------------------------------------------------------------------------------------------------------------------------|
| Kuopio University Hospital                   | E. Huttunen, R. Ikäheimo, P. Karhapää, P. Kekäläinen, M. Laakso, T. Lakka, E. Lampainen, L. Moilanen, L. Niskanen, U. Tuovinen, I. Vauhkonen, E. Voutilainen |
| Kuusamo Health Centre                        | T. Kääriäinen, E. Isopoussu                                                                                                                                  |
| Kuusankoski Hospital                         | E. Kilki, I. Koskinen, L. Riihelä                                                                                                                            |
| Laakso Hospital, Helsinki                    | T. Meriläinen, P. Poukka, R. Savolainen, N. Uhlenius                                                                                                         |
| Lahti City Hospital                          | A. Mäkelä, M. Tanner                                                                                                                                         |
| Lapland Central Hospital, Rovaniemi          | L. Hyvärinen, S. Severinkangas, T. Tulokas                                                                                                                   |
| Lappeenranta Health Centre                   | P. Linkola, I. Pulli                                                                                                                                         |
| Lohja Hospital                               | T. Granlund, M. Saari, T. Salonen                                                                                                                            |
| Loimaa Health Centre                         | A. Mäkelä, P. Eloranta                                                                                                                                       |
| Länsi-Uusimaa Hospital, Tammisaari           | I-M. Jousmaa, J. Rinne                                                                                                                                       |
| Malmi Hospital, Helsinki                     | H. Lanki, S. Moilanen, M. Tilly-Kiesi                                                                                                                        |
| Mikkeli Central Hospital                     | A. Gynther, R. Manninen, P. Nironen, M. Salminen, T. Vänttinen                                                                                               |
| Mänttä Regional Hospital                     | I. Pirttiniemi, A-M. Hänninen                                                                                                                                |
| North Karelian Hospital, Joensuu             | U-M. Henttula, P. Kekäläinen, M. Pietarinen, A. Rissanen, M. Voutilainen                                                                                     |
| Nurmijärvi Health Centre                     | A. Burgos, K. Urtamo                                                                                                                                         |
| Oulankangas Hospital, Oulainen               | E. Jokelainen, P-L. Jylkkä, E. Kaarlela, J. Vuolaspuro                                                                                                       |
| Oulu Health Centre                           | L. Hiltunen, R. Häkkinen, S. Keinänen-Kiukaanniemi                                                                                                           |
| Oulu University Hospital                     | R. Ikäheimo                                                                                                                                                  |
| Päijät-Häme Central Hospital                 | H. Haapamäki, A. Helanterä, S. Hämäläinen, V. Ilvesmäki, H. Miettinen                                                                                        |
| Palokka Health Centre                        | P. Sopenan, L. Welling                                                                                                                                       |
| Pieksämäki Hospital                          | V. Javtsenko, M. Tamminen                                                                                                                                    |
| Pietarsaari Hospital                         | M-L. Holmbäck, B. Isomaa, L. Sarelin                                                                                                                         |
| Pori City Hospital                           | P. Ahonen, P. Merensalo, K. Sävelä                                                                                                                           |
| Porvoo Hospital                              | M. Kallio, B. Rask, S. Rämö                                                                                                                                  |
| Raahe Hospital                               | A. Holma, M. Honkala, A. Tuomivaara, R. Vainionpää                                                                                                           |
| Rauma Hospital                               | K. Laine, K. Saarinen, T. Salminen                                                                                                                           |
| Riihimäki Hospital                           | P. Aalto, E. Immonen, L. Juurinen                                                                                                                            |
| Salo Hospital                                | A. Alanko, J. Lapinleimu, P. Rautio, M. Virtanen                                                                                                             |
| Satakunta Central Hospital, Pori             | M. Asola, M. Juhola, P. Kunelius, M-L. Lahdenmäki, P. Pääkkönen, M. Rautavirta                                                                               |
| Savonlinna Central Hospital                  | E. Korpi-Hyövälti, T. Latvala, E. Leijala                                                                                                                    |
| South Karelia Central Hospital, Lappeenranta | T. Ensala, E. Hussi, R. Härkönen, U. Nyholm, J. Toivanen                                                                                                     |
| Tampere Health Centre                        | A. Vaden, P. Alarotu, E. Kujansuu, H. Kirkkopelto-Jokinen, M. Helin, S. Gummerus, L. Calonius, T. Niskanen, T. Kaitala, T. Vatanen                           |
| Tampere University Hospital                  | I. Ala-Houhala, T. Kuningas, P. Lampinen, M. Määttä, H. Oksala, T. Oksanen, K. Salonen, H. Tauriainen, S. Tulokas                                            |
| Tiirismaa Health Centre, Hollola             | T. Kivelä, L. Petlin, L. Savolainen                                                                                                                          |
| Turku Health Centre                          | I. Hämäläinen, H. Virtamo, M. Vähätalo                                                                                                                       |
| Turku University Central Hospital            | K. Breitholz, R. Eskola, K. Metsärinne, U. Pietilä, P. Saarinen, R. Tuominen, S. Äyräpää                                                                     |
| Vaajakoski Health Centre                     | K. Mäkinen, P. Sopenan                                                                                                                                       |
| Valkeakoski Regional Hospital                | S. Ojanen, E. Valtonen, H. Ylönen, M. Rautiainen, T. Immonen                                                                                                 |
| Vammala Regional Hospital                    | I. Isomäki, R. Kroneld, M. Tapiolinn-Mäkelä                                                                                                                  |
| Vaasa Central Hospital                       | S. Bergkulla, U. Hautamäki, V-A. Myllyniemi, I. Rusk                                                                                                         |

## **The SDRNT1BIO Study Centres**

### **Arran & Ayrshire**

Ayr Hospital

Professor Andrew Collier  
Karen Allan

University Hospital Crosshouse, Kilmarnock

Danielle Gilmour  
Margo Henry

### **Dumfries & Galloway**

Dumfries & Galloway Royal Infirmary

Dr Fiona Green  
Jean Bell

### **Fife**

Queen Margaret Hospital, Dunfermline

Dr John Chalmers  
Karen Gray

### **Glasgow**

Clinical Research Facility, Western Infirmary

Dr Robert Lindsay  
Hilary Peddie

Glasgow Royal Infirmary

Professor John Petrie

### **Grampian**

Centre of Diabetes and Endocrinology, Aberdeen

Professor Donald Pearson  
Julie Toye

### **Highlands & Islands**

Highland Clinical Research Facility, Inverness

Professor Sandra Macrury  
Wendy Mackinnon

### **Lanarkshire**

David Matthews Diabetes Centre, Monklands Hospital, Airdrie

Dr Sandeep Thekkepat  
Berni Welsh  
Linda Macliver  
Dina Bell

### **Lothian**

Department of Diabetes, Royal Infirmary of Edinburgh

Dr Allan Patrick  
Alison Sudworth  
Claire Gallacher

Western General Hospital, Edinburgh

Professor John McKnight  
Alex Clark  
Roz Graham

NHS National Services Scotland, Edinburgh

Dr Colin Fischbacher

St Johns Hospital, Livingston

Katie Farley

### **Tayside**

Ninewells Hospital, Dundee

Professor Colin Palmer  
Lynsey Beal  
Sheena Pritchard
